# Supplementary material for: All‐Trans Retinoic Acid Promotes a Tumor Suppressive OTUD6B‐β‐TrCP‐SNAIL Axis in Esophageal Squamous Cell Carcinoma and Enhances Immunotherapy
Source: PubMed Central journal article supplement (PMC10238178; doi:10.1002/advs.202207458), 2023-04-10
Supplement: ADVS-10-2207458-s001.pdf [file ADVS-10-2207458-s001.pdf]

## Supporting Information

for *Adv. Sci.*, DOI 10.1002/adv.202207458

All-Trans Retinoic Acid Promotes a Tumor Suppressive OTUD6B- $\beta$ -TrCP-SNAIL Axis in Esophageal Squamous Cell Carcinoma and Enhances Immunotherapy

*Lei Li, Rui Zhu, Honghong Zhou, Chun-Ping Cui, Xiao Yu, Yuhao Liu, Yin Yin, Yang Li, Riyue Feng, Jonathan P. Katz, Yahui Zhao, Yun Zhang\*, Lingqiang Zhang\* and Zhihua Liu\**

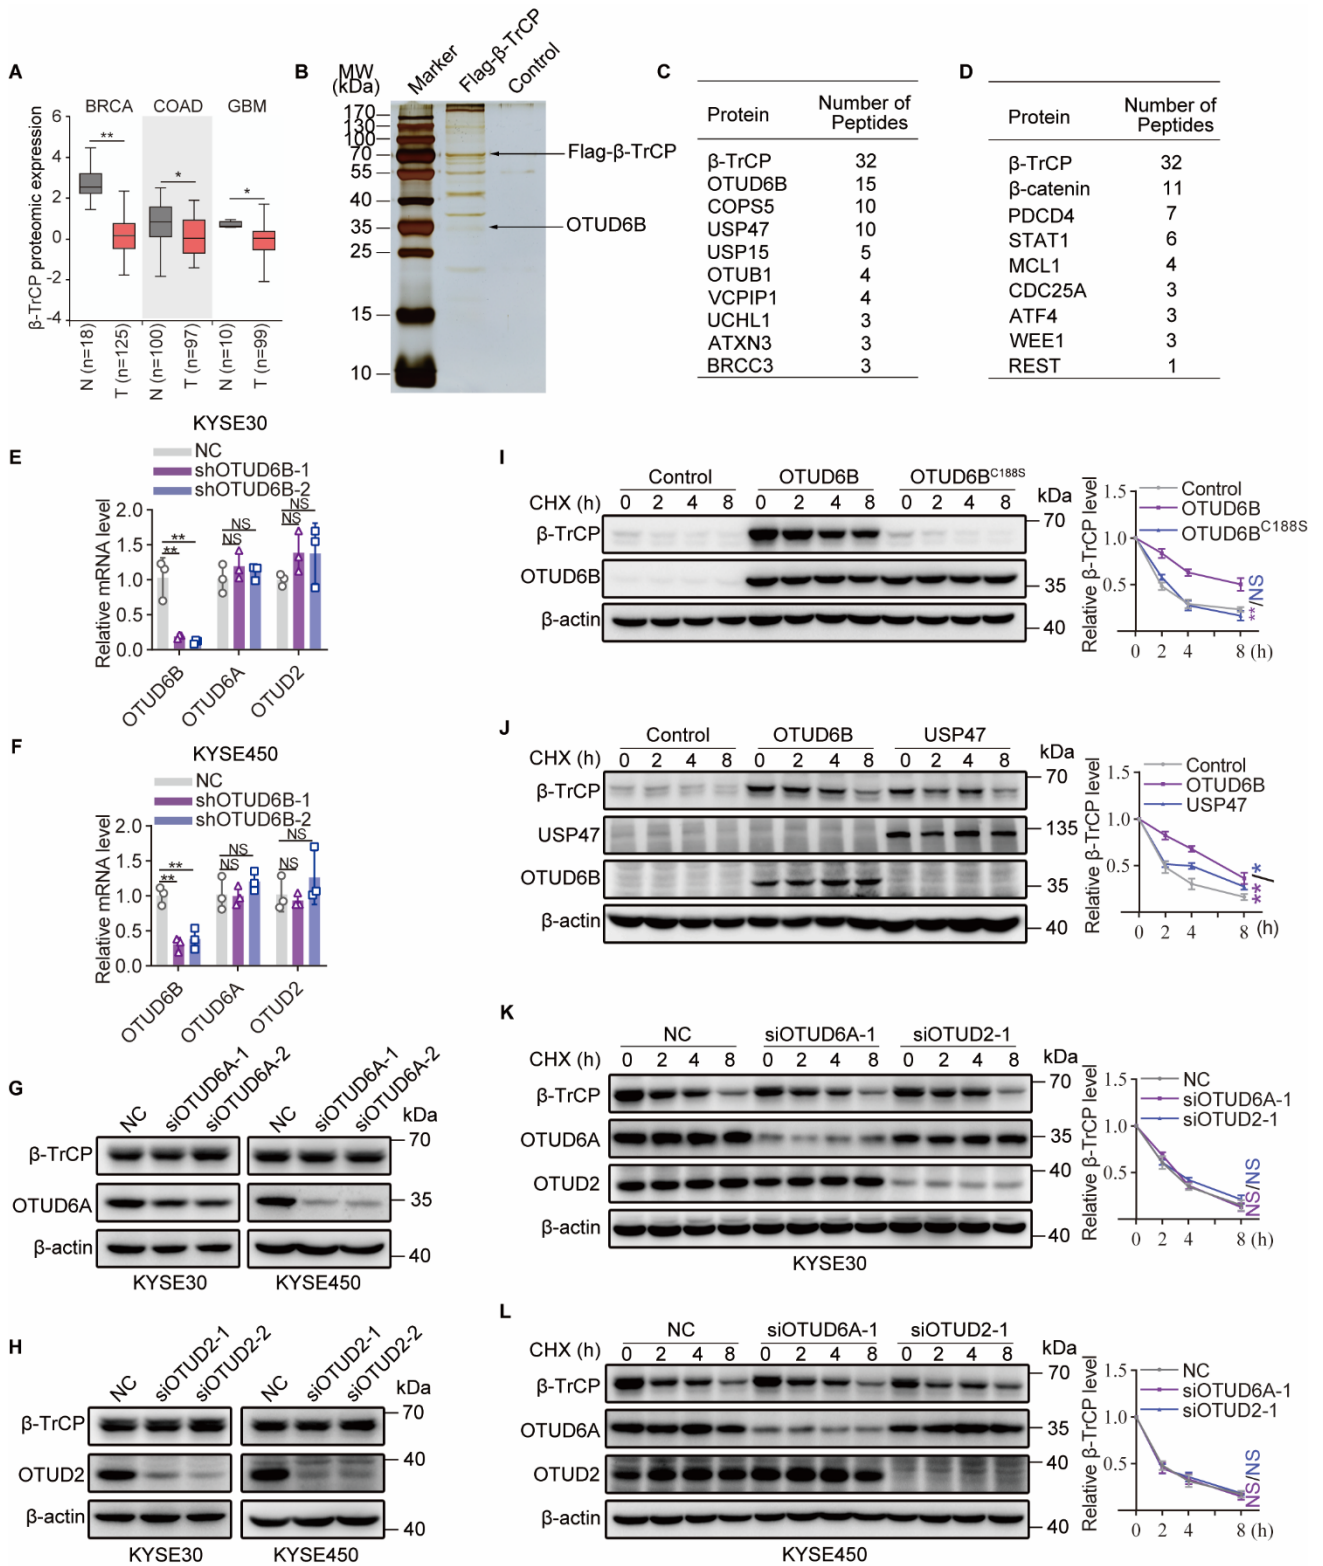

**Figure S1 OTUD6B enhances  $\beta$ -TrCP protein stability.**

(A) The relative protein level of  $\beta$ -TrCP was analyzed using the proteomic profiles in CPTAC data (only BRCA, COAD and GBM subsets including the level of  $\beta$ -TrCP). mean  $\pm$  SD, unpaired *t*-test, \*  $P < 0.05$ , \*\*  $P < 0.01$ .

(B) The immunoprecipitated proteins of Flag- $\beta$ -TrCP were resolved by gel electrophoresis and visualized by silver staining.

(C and D) The immunoprecipitated proteins of Flag- $\beta$ -TrCP were detected by MS. The peptide numbers of DUB proteins associated with Flag- $\beta$ -TrCP (C) and proteins known to bind with  $\beta$ -TrCP (D).

(E and F) The mRNA levels of OTUD6B, OTUD6A and OTUD2 in OTUD6B-knockdown KYSE30 (E) and KYSE450 (F) cells. n = 3, mean  $\pm$  SEM, unpaired *t*-test, \*\*  $P < 0.01$ , NS, not significant ( $P > 0.05$ ).

(G and H) The protein level of  $\beta$ -TrCP in OTUD6A-knockdown (G) or OTUD2-knockdown (H) KYSE30 and KYSE450 cells.

(I) OTUD6B or OTUD6B<sup>C188S</sup> was transfected into HEK293T cells, and the cells were treated with CHX (50  $\mu$ g/ml) for 2, 4, 8 hours. The degradation of  $\beta$ -TrCP was detected and quantified. n = 3, mean  $\pm$  SD, unpaired *t*-test, \*\*  $P < 0.01$ , NS, not significant ( $P > 0.05$ ).

(J) OTUD6B or USP47 was transfected into HEK293T cells, and the cells were treated with CHX (50  $\mu$ g/ml) for 2, 4, 8 hours. The degradation of  $\beta$ -TrCP was detected and quantified. n = 3, mean  $\pm$  SD, unpaired *t*-test, \*  $P < 0.05$ , \*\*  $P < 0.01$ .

(K and L) OTUD6A-knockdown or OTUD2-knockdown KYSE30 (K) and KYSE450 (L) cells were treated with CHX (50  $\mu$ g/ml) for 2, 4, 8 hours. The degradation of  $\beta$ -TrCP was detected and quantified. n = 3, mean  $\pm$  SD, unpaired *t*-test, NS, not significant ( $P > 0.05$ ).

The data shown in G-L are from a representative experiment in at least two replicates.

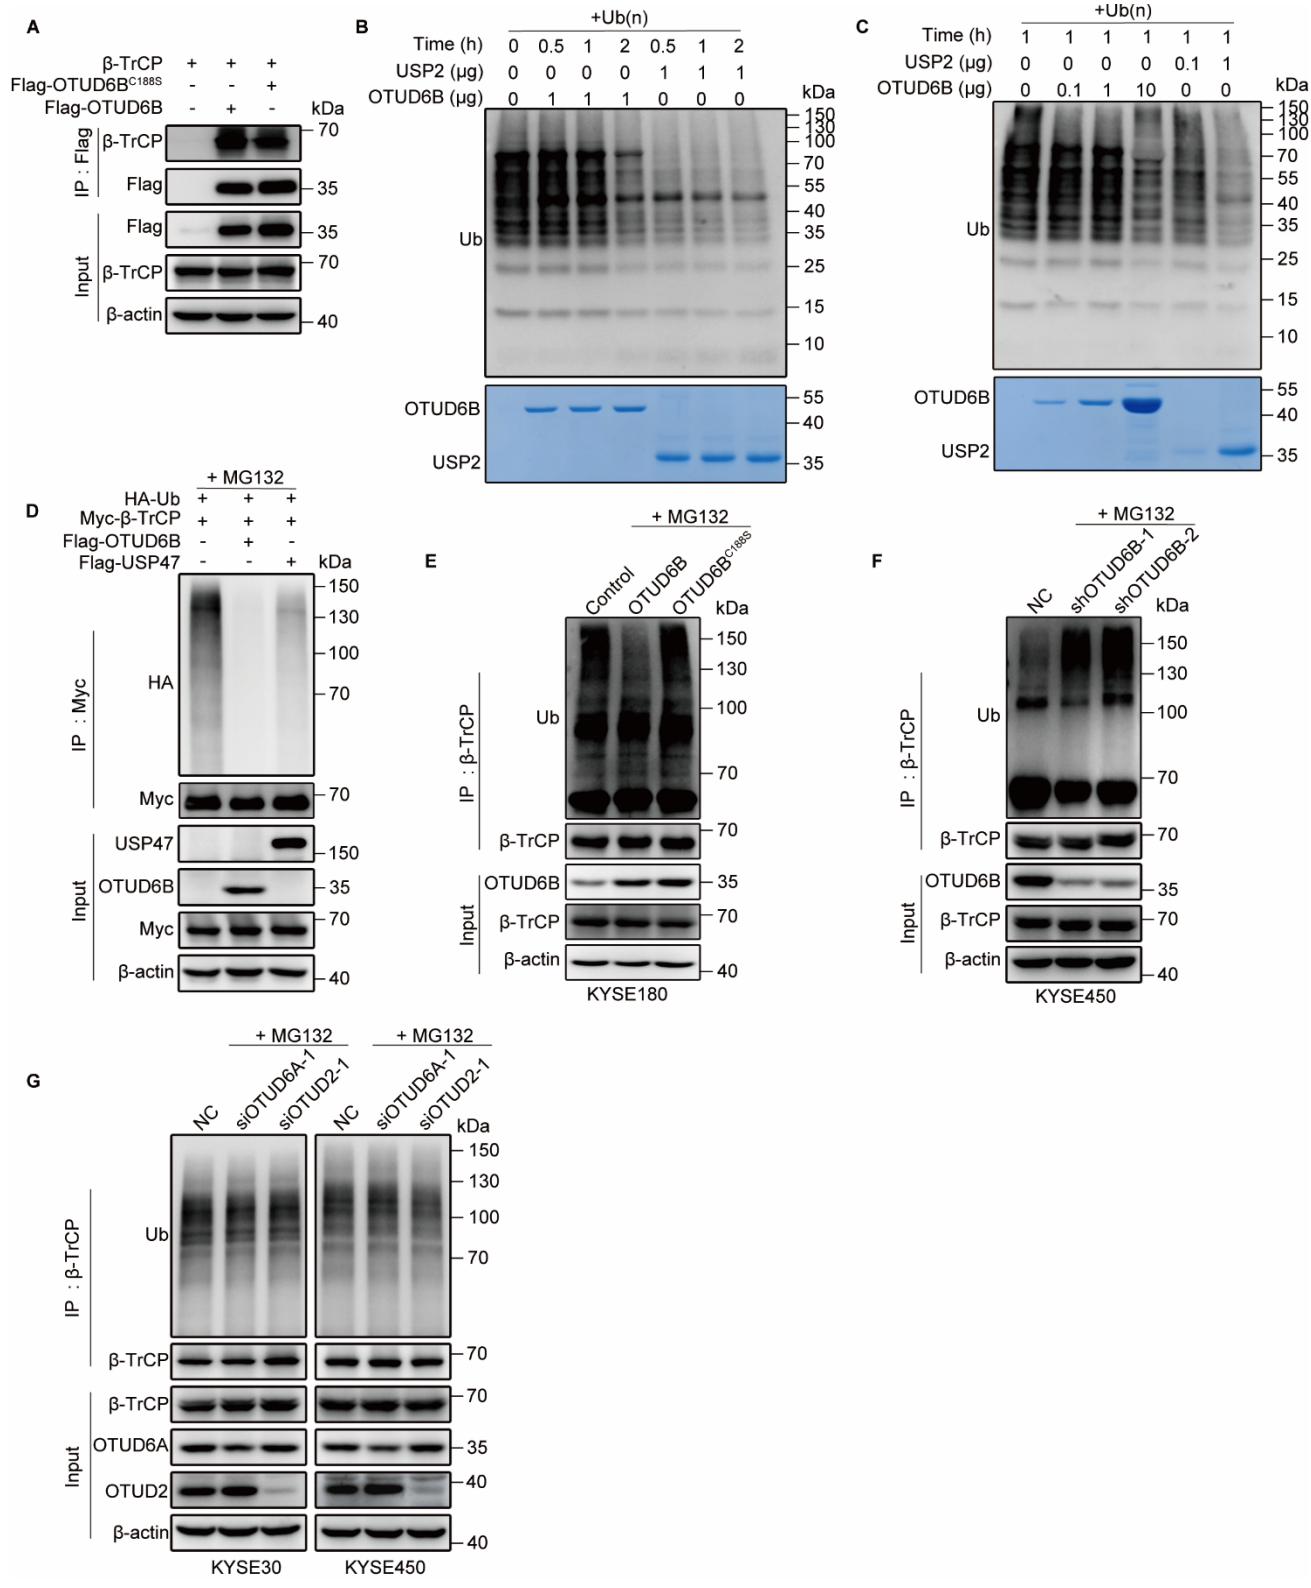

**Figure S2 OTUD6B directly interacts with and deubiquitinates  $\beta$ -TrCP.**

(A) Flag-OTUD6B or Flag-OTUD6B<sup>C188S</sup> plasmid was co-transfected with  $\beta$ -TrCP into HEK293T cells. The interaction of  $\beta$ -TrCP and OTUD6B or OTUD6B<sup>C188S</sup> was detected by immunoprecipitation assay.

(B) The Ub(n)-ubiquitylated substrate was incubated with purified GST-OTUD6B or USP2 for 0.5, 1, 2 hours at 37 °C. USP2 was used as a positive control. The status of ubiquitin was analyzed by immunoblotting.

(C) The Ub(n)-ubiquitylated substrate was incubated with purified GST-OTUD6B (0.1, 1, 10  $\mu$ g) or USP2 (0.1, 1  $\mu$ g) for one hour at 37 °C. The status of ubiquitin was analyzed by immunoblotting.

(D) Myc- $\beta$ -TrCP and HA-Ub were co-expressed with Flag-OTUD6B or Flag-USP47 into HEK293T cells. The ubiquitination level of  $\beta$ -TrCP was detected using an anti-HA antibody.

(E and F) The ubiquitination level of  $\beta$ -TrCP in OTUD6B- or OTUD6B<sup>C188S</sup>- overexpressing KYSE180 cells (E) and OTUD6B-knockdown KYSE450 cells (F).

(G) The ubiquitination level of  $\beta$ -TrCP in OTUD6A-knockdown or OTUD2-knockdown KYSE30 and KYSE450 cells.

All data from a representative experiment in at least two replicates.

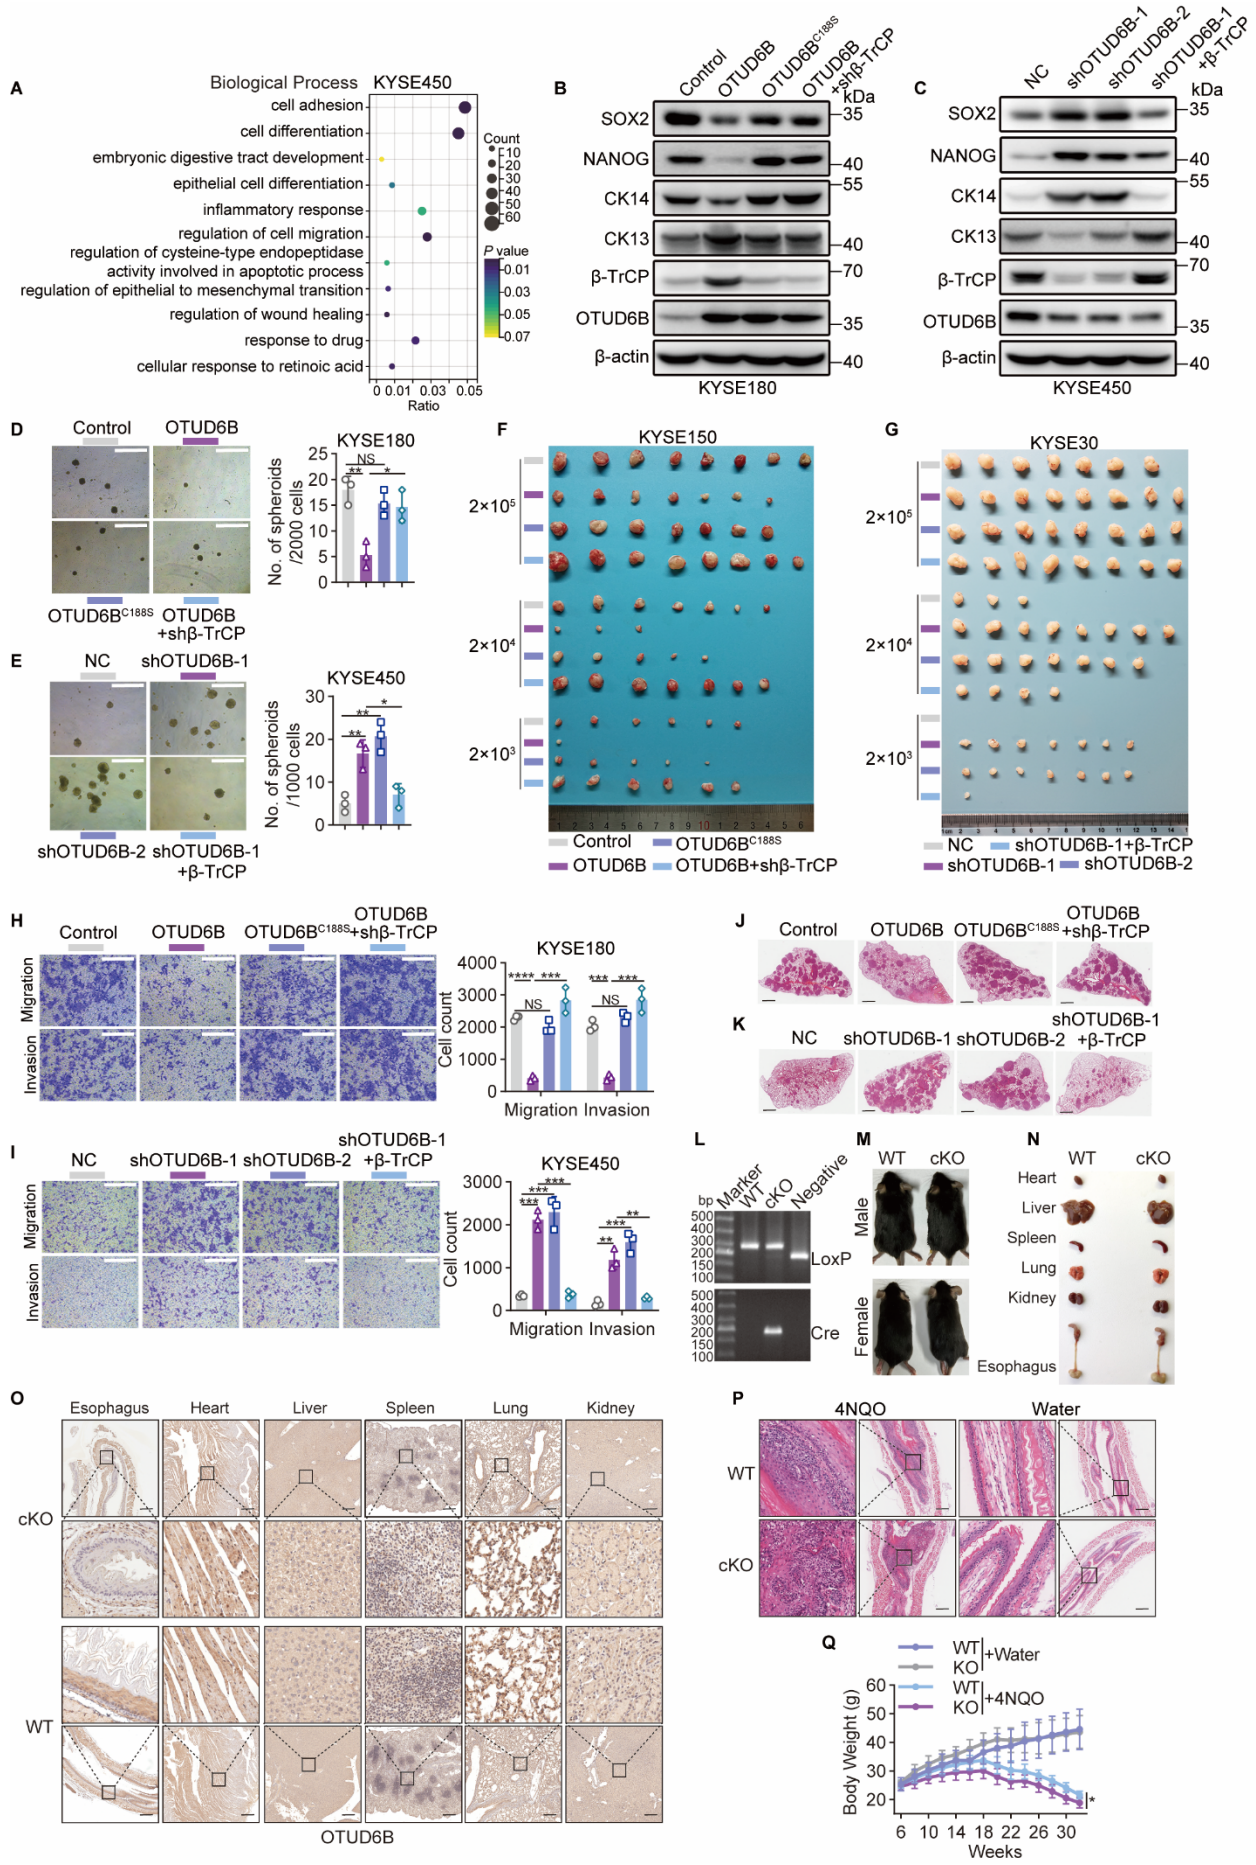

**Figure S3 OTUD6B reduces TIC properties of ESCC cells via  $\beta$ -TrCP.**

- (A) KYSE450 cells with or without OTUD6B-knockdown were subjected to RNA-seq and gene ontology (GO) analysis. A bubble chart shows the partial enriched terms of biological processes. The RNA-sequencing data are available at the GEO database (accession GSE209521).
- (B and C) The levels of SOX2, NANOG, CK14 and CK13 in the indicated KYSE180 cells (B) and KYSE450 cells (C). Data from a representative experiment in at least two replicates.
- (D and E) The spheroid formation capacity of the indicated KYSE180 cells (D) and KYSE450 cells (E) were detected by the spheroid formation assay. Scale bars, 500  $\mu$ m. n = 3, mean  $\pm$  SEM, unpaired *t*-test, \*  $P < 0.05$ , \*\*  $P < 0.01$ , NS, not significant ( $P > 0.05$ ).
- (F and G) The indicated KYSE150 (F) and KYSE30 (G) cells were subcutaneously injected into BALB/c nude mice to detect the tumor formation rates.
- (H and I) The migration and invasion capabilities of the indicated KYSE180 cells (H) and KYSE450 cells (I). Scale bars, 500  $\mu$ m. n = 3, mean  $\pm$  SEM, unpaired *t*-test, \*\*  $P < 0.01$ , \*\*\*  $P < 0.001$ , \*\*\*\*  $P < 0.0001$ , NS, not significant ( $P > 0.05$ ).
- (J and K) The indicated KYSE150 cells (J) and KYSE30 cells (K) were injected into the tail vein of NOD/SCID mice, and the H&E staining of indicated lungs. Scale bars, 2 mm.
- (L) The genotype of *Otud6b* WT and cKO mice tail.
- (M) Representative images of *Otud6b* WT and cKO mice.
- (N) Representative images of organs of *Otud6b* WT and cKO mice.
- (O) IHC staining of OTUD6B in the indicated organs of *Otud6b* WT and cKO mice.
- (P) H&E staining of the esophagus in 4NQO-induced *Otud6b* WT and cKO mice.
- (Q) The body weights of 4NQO-induced *Otud6b* WT and cKO mice. mean  $\pm$  SD, unpaired *t*-test, \*  $P < 0.05$ .

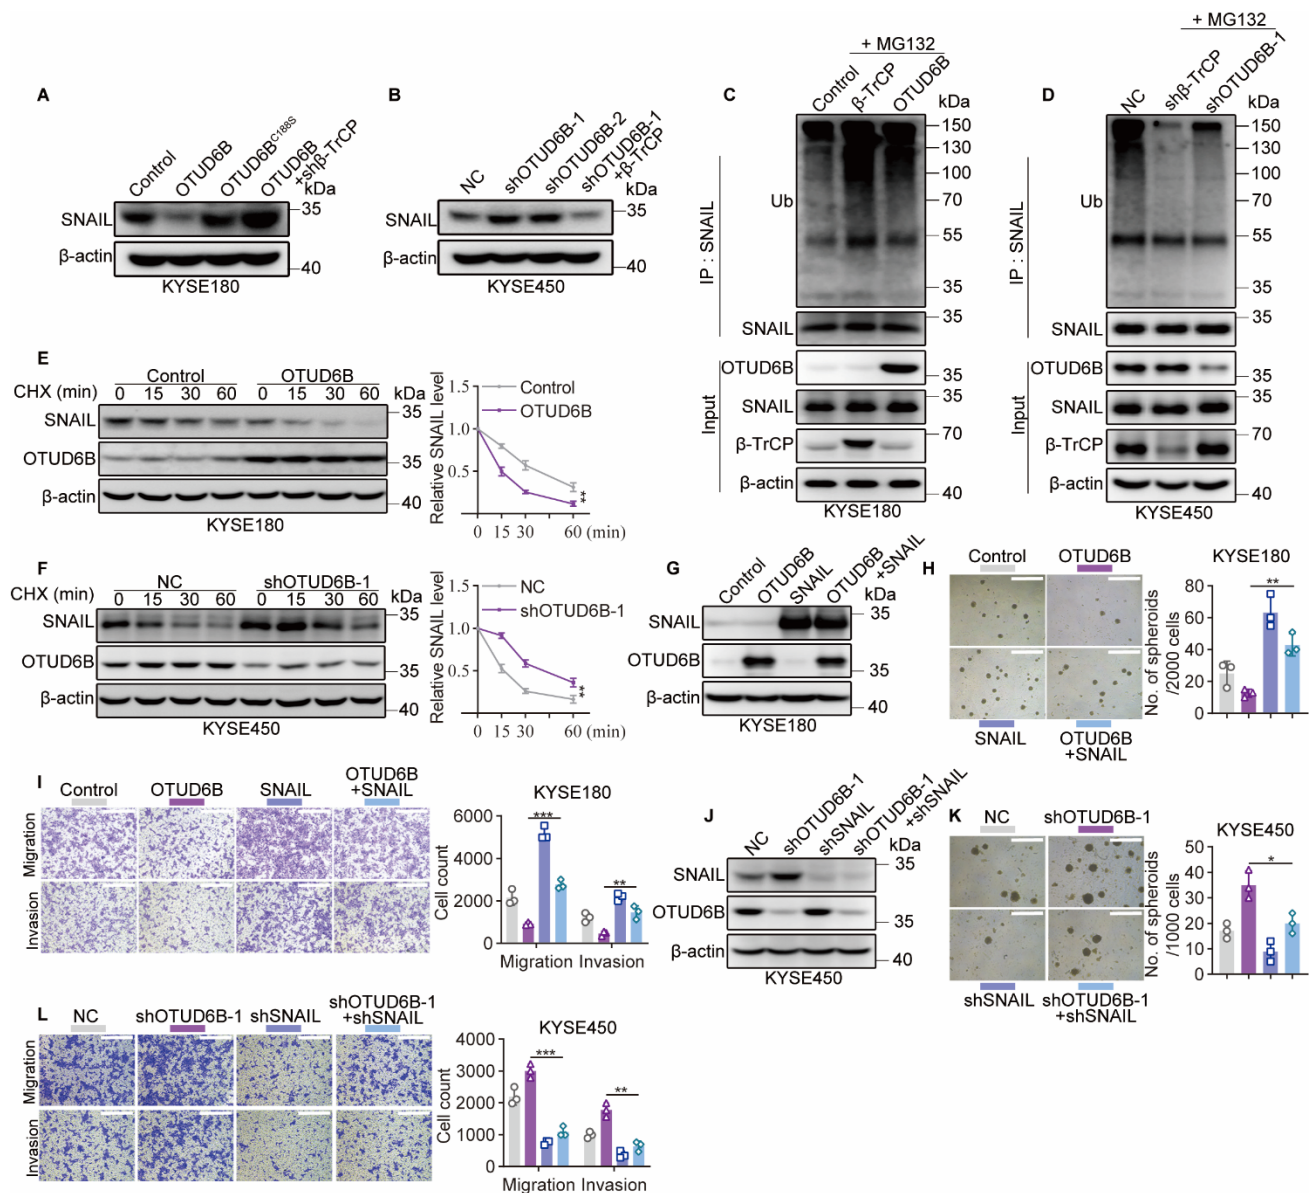

**Figure S4 OTUD6B promotes the degradation of SNAIL.**

(A and B) The levels of SNAIL in the indicated KYSE180 cells (A) and KYSE450 cells (B) were detected by immunoblotting.

(C) The ubiquitination level of SNAIL in OTUD6B- or  $\beta$ -TrCP- overexpressing KYSE180 cells.

(D) The ubiquitination level of SNAIL in  $\beta$ -TrCP-knockdown or OTUD6B-knockdown KYSE450 cells.

(E and F) The degradation of SNAIL in OTUD6B-overexpressing KYSE180 cells (E) or OTUD6B-knockdown KYSE450 cells (F) treated with CHX (50  $\mu$ g/ml) for 15, 30, 60 minutes.  $n = 3$ , mean  $\pm$  SD, unpaired  $t$ -test, \*\*  $P < 0.01$ .

(G) SNAIL was overexpressed in OTUD6B-overexpressing or control KYSE180 cells. The levels of



SNAIL and OTUD6B were detected by immunoblotting.

(H and I) The spheroid formation capacity (H) and migration and invasion capabilities (I) of the indicated KYSE180 cells. Scale bars, 500  $\mu\text{m}$ .  $n = 3$ , mean  $\pm$  SEM, unpaired  $t$ -test, \*\*  $P < 0.01$ , \*\*\*  $P < 0.001$ .

(J) SNAIL was knocked down in OTUD6B-knockdown KYSE450 cells. The levels of SNAIL and OTUD6B were detected by immunoblotting.

(K and L) The spheroid formation capacity (K) and migration and invasion capabilities (L) of the indicated KYSE450 cells. Scale bars, 500  $\mu\text{m}$ .  $n = 3$ , mean  $\pm$  SEM, unpaired  $t$ -test, \*  $P < 0.05$ , \*\*  $P < 0.01$ , \*\*\*  $P < 0.001$ .

The data shown in A-F are from a representative experiment in at least two replicates.

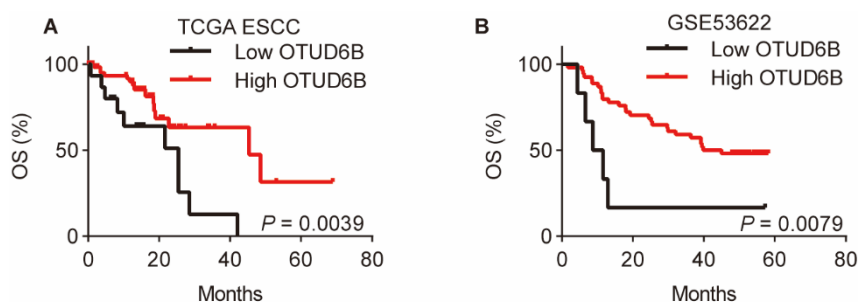

**Figure S5 Reduced OTUD6B predicts a poor prognosis in ESCC patients.**

(A and B) Kaplan-Meier plot of the overall survival of ESCC patients stratified by OTUD6B expression using the TCGA ESCC (A) and GSE53622 (B) datasets. Two-sided log-rank test.

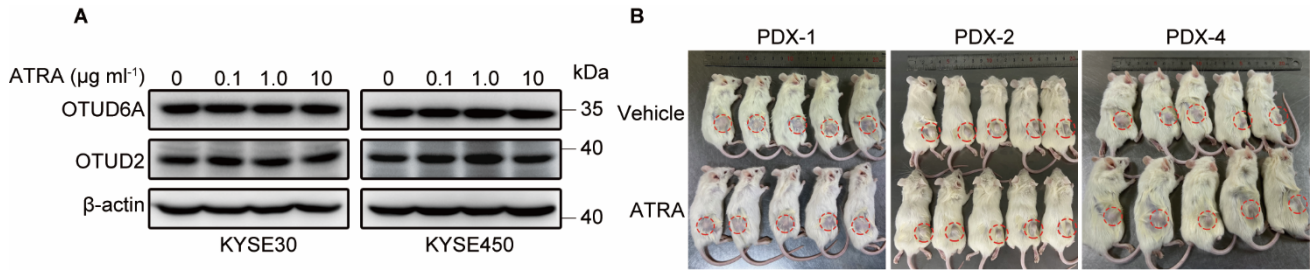

**Figure S6 OTUD6B is critical for ATRA-mediated inhibition of TIC properties in ESCC.**

(A) The protein levels of OTUD6A and OTUD2 in KYSE30 and KYSE450 cells treated with ATRA (0.1, 1, 10 µg/ml). Data from a representative experiment in at least two replicates.

(B) Images of PDX-1, PDX-2 and PDX-4 mice treated with or without ATRA (5 mg/kg).

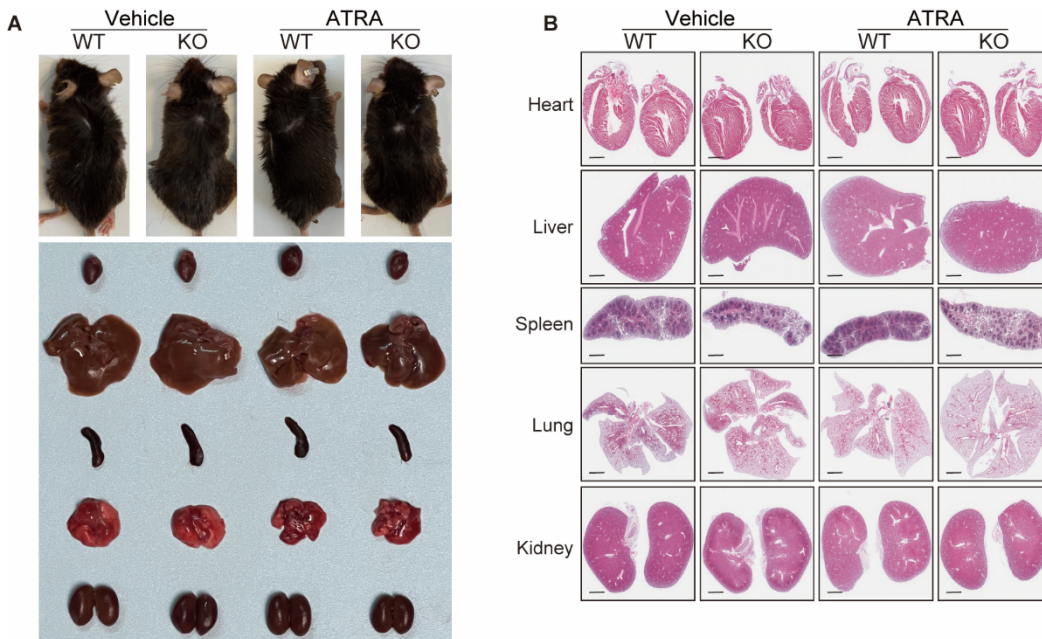

**Figure S7 ATRA enhances the response of established ESCC tumors to anti-PD-1 immunotherapy.**

(A and B) Representative images (A) and H&E staining (B) of the indicated organs in 4NQO-induced *Otud6b* WT and cKO mice treated with or without ATRA.

**Table S1. List of primers used for plasmids construction and target sequence of shRNAs and siRNAs.**

| <b>Genes</b>            | <b>Forward Primer 5'-3'</b>                 | <b>Reverse Primer 5'-3'</b>                 |
|-------------------------|---------------------------------------------|---------------------------------------------|
| OTUD6B                  | TTGGATCCGCCACCATGGAGG<br>CGGTATTGACCGAAGAGC | TTGCGGCCGCTTAGCTGCAAT<br>TTTCAGTAACTATG     |
| OTUD6B <sup>C188S</sup> | AGATTCCATCTGATGGCCACAG<br>TATGTATAAAGCCA    | TTCAATGGCTTTATACATACTG<br>TGGCCATCAGATGG    |
| GST-<br>OTUD6B-N        | TTGGATCCGCCACCATGGAGGC<br>GGTATTGACCGAAGAGC | TTGCGGCCGCTTAAATCTGTTT<br>AATTTCTAACTGT     |
| GST-<br>OTUD6B-C        | TTGGATCCGCCACCATGCCATC<br>TGATGGCCACTGTATGT | TTGCGGCCGCTTAGCTGCAATT<br>TTCAGTAACTATG     |
| OTUD6B<br>5'UTR         | AAGCTTGCGCACGCGCAGCAC<br>CCCATTTAAG         | CCATGGTGGCTACGGCTGGGA<br>CCCAGCCCCG         |
| OTUD6B<br>3'UTR         | GGATCCTCTAGATTTATACAAT<br>GTTGTACAATTATGT   | GCGGCCGCTCTAGATGTTGATT<br>TAATTCATTCATTTTTT |
| $\beta$ -TrCP           | TTGGATCCGCCACCATGGACCC<br>GGCCGAGGCGGTGCTGC | TTACTAGTTTATCTGGAGATGT<br>AGGTGTATGTT       |
| GST- $\beta$ -TrCP-N    | TTGGATCCGCCACCATGGACCC<br>GGCCGAGGCGGTGCTGC | TTGCGGCCGCTTAACTTCGGCA<br>GTGAATTCTCTGT     |
| GST- $\beta$ -TrCP-C    | TTGGATCCGCCACCATGGAAAC<br>AAGCAAAGGAGTTTACT | TTACTAGTTTATCTGGAGATGT<br>AGGTGTATGTT       |
| SNAIL                   | TTGGATCCGCCACCATGCCGCG<br>CTCTTTCTC         | TTGCGGCCGCGCGGGGACATC<br>CTGAGCAGCCGGAC     |
| RAR $\alpha$            | TTGGATCCGCCACCATGGCCAG<br>CAACAGCAGCTCCTGCC | TTACTAGTTCACGGGGAGTGGG<br>TGGCCGGGCTG       |
| ATXN3                   | TTGGATCCGCCACCATGGAGTC<br>CATCTTCCACGAGAAAC | TTCCGCGGTTTTTTTCCTTCTGT<br>TTCAAATCA        |
| BRCC3                   | TTGCTAGCGCCACCATGGCGGT<br>GCAGGTGGTGCAGGCGG | TTCCGCGGTTCTAGAGAAGAA<br>AGTTCTTGCATA       |
| COPS5                   | TTGGATCCGCCACCATGGCGGC<br>GTCCGGGAGCGGTATGG | TTCCGCGGAGAGATGTTAATTT<br>GATTAAACAGT       |
| USP15                   | TTGCTAGCGCCACCATGGCGGA<br>AGGCGGAGCGGCGGATC | TTCCGCGGGTTAGTGTGCATAC<br>AGTTTTCATTT       |
| USP47                   | TTGCTAGCGCCACCATGGTGCC<br>CGGCGAGGAGAACCAAC | TTCCGCGGGTCTTGAGTCAGAT<br>CTTTATTTGGT       |
| UCHL1                   | TTGGATCCGCCACCATGCAGCT<br>CAAGCCGATGGAGATCA | TTCCGCGGGGCTGCCTTGCAGA<br>GAGCCACGGCA       |
| OTUB1                   | TTGCTAGCGCCACCATGGCGGC<br>GGAGGAACCTCAGCAGC | TTTCTAGATTTGTAGAGGATAT<br>CGTAGTGTCCA       |
| VCPIP1                  | TTGCTAGCGCCACCATGTCTCA<br>GCCGCCGCCGCCGCGC  | TTCCGCGGAGAGTGATCCATTG<br>GCTCAGTTGTG       |
| shOTUD6B-1              | CAATTGAAGCTGACTACTA                         | /                                           |
| shOTUD6B-2              | CTAGACAGTTAGAAATTAA                         | /                                           |

|                   |                       |   |
|-------------------|-----------------------|---|
| sh $\beta$ -TrCP  | CTGGAGGCAGATGACATCTAA | / |
| shSNAIL           | CCACTCAGATGTCAAGAAGTA | / |
| siRAR $\alpha$ -1 | GTGAGAAACGACCGAAACA   | / |
| siRAR $\alpha$ -2 | CTCAGAACAACGTGTCTCT   | / |
| siOTUD6A-1        | GCACTACAACCTCCGTGACA  | / |
| siOTUD6A-2        | CCAGCTACATGAAGAAGCA   | / |
| siOTUD2-1         | GGGATACCATTCTGGAAGA   | / |
| siOTUD2-2         | GGAGCAATAGAGATATCGA   | / |

---

**Table S2. List of primary antibodies**

| <b>Name</b>    | <b>Cat#</b> | <b>Company</b>            | <b>Application</b>               |
|----------------|-------------|---------------------------|----------------------------------|
| OTUD6B         | NBP1-85652  | Novus Biologicals         | IB: 1:500, IF: 1:100, IHC: 1:100 |
| OTUD6B         | PA5-110067  | Invitrogen                | IP: 1:100                        |
| $\beta$ -TrCP  | #4394       | Cell Signaling Technology | IB: 1000, IP: 1:100              |
| $\beta$ -TrCP  | 37-3400     | Invitrogen                | IF: 1:200                        |
| $\beta$ -TrCP  | ab71753     | Abcam                     | IHC: 1:100                       |
| SNAIL          | #3879       | Cell Signaling Technology | IB: 1000                         |
| SNAIL          | sc-28199    | Santa Cruz Biotechnology  | IF: 1:100, IP: 1:100             |
| SNAIL          | ab180714    | Abcam                     | IHC: 1:100                       |
| Ubiquitin      | #3936       | Cell Signaling Technology | IB: 1000                         |
| SOX2           | #3579       | Cell Signaling Technology | IB: 1000                         |
| SOX2           | ab92494     | Abcam                     | IHC: 1:100                       |
| NANOG          | #4903       | Cell Signaling Technology | IB: 1000                         |
| NANOG          | ab214549    | Abcam                     | IHC: 1:100                       |
| CK13           | 10164-2-AP  | Proteintech               | IB: 1:5000, IHC: 1:100           |
| CK14           | 60320-1-lg  | Proteintech               | IB: 1:1000                       |
| RAR $\alpha$   | #62294      | Cell Signaling Technology | IB: 1000, RIP: 100               |
| GST            | #2625       | Cell Signaling Technology | IB: 1000                         |
| HA             | #3724       | Cell Signaling Technology | IB: 1000                         |
| Flag           | #14793      | Cell Signaling Technology | IB: 1000                         |
| Myc-tag        | 562         | MBL                       | IB: 2000                         |
| $\beta$ -actin | A5316       | Sigma Aldrich             | IB: 5000                         |
| OTUD6A         | 24486-1-AP  | Proteintech               | IB: 1000                         |
| OTUD2          | 25370-1-AP  | Proteintech               | IB: 1000                         |
| Mouse PD-1     | BE0146      | Bio X Cell                | 5 mg/kg                          |
| IgG2a control  | BE0089      | Bio X Cell                | 5 mg/kg                          |

immunoblotting (IB), immunofluorescence (IF), immunoprecipitation (IP), immunohistochemistry (IHC), RNA-immunoprecipitation (RIP).

**Table S3. List of primers used for qPCR**

| <b>Genes</b>  | <b>Forward Primer 5'-3'</b> | <b>Reverse Primer 5'-3'</b>  |
|---------------|-----------------------------|------------------------------|
| OTUD6B        | AAGAGACGGGAAAAGAAAGC        | ATTAGGGTTTGTAAAAATGGCA<br>GA |
| $\beta$ -TrCP | ACCAACATGGGCACATAAACTC      | TGGCATCCAGGTATGACAGAAT       |
| OTUD6A        | ATGGATGATCCGAAGAGTGAAC<br>A | GGTCTTGGGGACCGAGTTTT         |
| OTUD2         | GGTCAGCGAATCCTCGTCG         | CACCACGTTTAGTAAATGCAGGT      |
| GAPDH         | AGGGCTGCTTTTAACTCTG         | CTGGAAGATGGTGATGGG           |
